# Supplementary material for: Glycosidase-targeting small molecules for biological and therapeutic applications
Source: Royal Society of Chemistry journal article supplement (doi:10.1039/d3cs00032j), 2023-01-01
Supplement: d3cs00032j1.pdf [file d3cs00032j1.pdf]

## SUPPORTING INFORMATION

### Glycosidase-targeting small molecules for biological and therapeutic applications

Yujun Kim,<sup>‡a</sup> Hui Li,<sup>‡a</sup> Joohee Choi,<sup>a</sup> Jihyeon Boo,<sup>a</sup> Hyemi Jo,<sup>a,b</sup> Ji Young Hyun,<sup>\*,b</sup> and Injae Shin<sup>\*,a</sup>

<sup>a</sup>Department of Chemistry, Yonsei University, 03722 Seoul, Republic of Korea.

<sup>b</sup>Department of Drug Discovery, Data Convergence Drug Research Center, Korea Research Institute of Chemical Technology (KRICT), Daejeon 34114, Republic of Korea.

<sup>‡</sup>Two authors equally contributed to this study.

**Table S1.** Summary of fluorescent probes (Abbreviation: S = Senescence).

| Substance No | Target glycosidase     | Cells                                                                                                                          | Absorption/emission wavelength (nm)                                     | Ref. |
|--------------|------------------------|--------------------------------------------------------------------------------------------------------------------------------|-------------------------------------------------------------------------|------|
| 1            | $\beta$ -Galactosidase | OVCAR-3 (Ovarian cancer)                                                                                                       | 450/550                                                                 | 34   |
| 2            | $\beta$ -Galactosidase | OVCAR-3 (Ovarian cancer)                                                                                                       | 490/640                                                                 | 35   |
| 3            | $\beta$ -Galactosidase | HEK293 (Kidney)<br>SKOV-3 (Ovarian cancer)                                                                                     | 465/676                                                                 | 40   |
| 4            | $\beta$ -Galactosidase | SKOV-3 (Ovarian cancer)                                                                                                        | 525/665                                                                 | 41   |
| 5            | $\beta$ -Galactosidase | SKOV-3 (Ovarian cancer)<br>4T1 (Breast cancer)                                                                                 | 660/730                                                                 | 42   |
| 6            | $\beta$ -Galactosidase | OVCAR-3 (Ovarian cancer)<br>SKOV-3 (Ovarian cancer)                                                                            | 570/764                                                                 | 43   |
| 7            | $\beta$ -Galactosidase | SKOV-3 (Ovarian cancer)                                                                                                        | 725/770                                                                 | 44   |
| 8            | $\beta$ -Galactosidase | OVCAR-3 (Ovarian cancer)<br>HEK293T (Kidney)                                                                                   | 410/500 ( $\downarrow$ ); 410/570 ( $\uparrow$ )<br>(FRET; Ratiometric) | 46   |
| 9            | $\beta$ -Galactosidase | OVCAR-3 (Ovarian cancer)<br>SKOV-3 (Ovarian cancer)<br>HT-29 (Colon cancer)                                                    | 510/620 ( $\downarrow$ ); 552/662 ( $\uparrow$ )<br>(FRET; Ratiometric) | 47   |
| 10           | $\beta$ -Galactosidase | HepG2 (Liver cancer; S)                                                                                                        | 415/492                                                                 | 51   |
| 11           | $\beta$ -Galactosidase | SKOV-3 (Ovarian cancer)<br>HepG2 (Liver cancer; S)<br>Hep3B (Liver cancer; S)                                                  | 425/662                                                                 | 52   |
| 12           | $\beta$ -Galactosidase | COS-7 (Kidney; S)                                                                                                              | 500/585                                                                 | 53   |
| 13a-b        | $\beta$ -Galactosidase | OVCAR-3 (Ovarian cancer)<br>SKOV-3 (Ovarian cancer)<br>A549 (Lung cancer; S)<br>HL-7702 (Liver; S)<br>MRC-5 (Lung; S)          | 460/560                                                                 | 54   |
| 14           | $\beta$ -Galactosidase | A549 (Lung cancer; S)                                                                                                          | 451/526                                                                 | 55   |
| 15           | $\beta$ -Galactosidase | SHIN3 (Ovarian cancer)<br>A549 (Lung cancer; S)                                                                                | 380/445                                                                 | 56   |
| 16           | $\beta$ -Galactosidase | SKOV-3 (Ovarian cancer)<br>A2780 (Ovarian cancer)<br>IOSE80 (Ovary; S)<br>HepG2 (Liver cancer; S)<br>HeLa (Cervical cancer; S) | 580/642                                                                 | 57   |
| 17           | $\beta$ -Galactosidase | OVCAR-3 (Ovarian cancer)<br>HeLa (Cervical cancer; S)                                                                          | 415/570 ( $\downarrow$ ); 415/670 ( $\uparrow$ )<br>(FRET; Ratiometric) | 58   |
| 18           | $\beta$ -Galactosidase | SKOV-3 (Ovarian cancer)<br>Wi38 (Lung; S)                                                                                      | 420/625                                                                 | 62   |
| 19           | $\beta$ -Galactosidase | MDA-MB-231 (Breast cancer; S)<br>A549 (Lung cancer; S)<br>C6 (Glioblastoma; S)                                                 | 655/675                                                                 | 63   |
| 20           | $\beta$ -Glucosidase   | -                                                                                                                              | 600/636                                                                 | 69   |

| Substance No | Target glycosidase                  | Cells                                               | Absorption/emission wavelength (nm)                                        | Ref. |
|--------------|-------------------------------------|-----------------------------------------------------|----------------------------------------------------------------------------|------|
| 21a-f        | $\beta$ -Glucosidase                | -                                                   | 350/535                                                                    | 71   |
| 22a,b,e      | $\beta$ -N-Acetylglucosaminidase    | -                                                   | 350/535                                                                    | 71   |
| 23a,b,e      | $\beta$ -Glucuronidase              | -                                                   | 350/535                                                                    | 71   |
| 24a          | $\alpha$ -Galactosidase             | SK-N-SH (Neuroblastoma)                             | 545/590                                                                    | 74   |
| 24b          | $\alpha$ -N-Acetylgalactosaminidase | SK-N-SH (Neuroblastoma)                             | 545/590                                                                    | 74   |
| 25           | $\beta$ -Hexosaminidase             | -                                                   | 550/598                                                                    | 78   |
| 26           | $\beta$ -Hexosaminidase             | -                                                   | 470/545                                                                    | 79   |
| 27           | $\beta$ -Hexosaminidase             | HCT116 (Colon cancer)                               | 344/612                                                                    | 80   |
| 28           | $\beta$ -Hexosaminidase             | -                                                   | 690/716                                                                    | 81   |
| 29           | $\beta$ -Hexosaminidase             | SW480 (Colon cancer)                                | 438/475 ( $\downarrow$ ); 438/540 ( $\uparrow$ )<br>(Ratiometric)          | 82   |
| 30a-d        | O-GlcNAcase                         | AGS (Stomach cancer)<br>Capan-1 (Pancreatic cancer) | 488/520                                                                    | 89   |
| 31           | O-GlcNAcase                         | -                                                   | 400/440 (Coumarin)<br>510/540 (Rhodol)                                     | 90   |
| 32a-c        | $\alpha$ -Fucosidase                | HeLa (Cervical cancer)<br>SK-N-SH (Neuroblastoma)   | 385/502 ( <b>32a</b> )<br>491/510 ( <b>32b</b> )<br>571/585 ( <b>32c</b> ) | 97   |
| 33           | $\alpha$ -Fucosidase                | SMMC-7721 (Liver cancer)                            | 800/520-620<br>(Two-photon excitation)                                     | 98   |
| 34           | $\alpha$ -Fucosidase                | HCT116 (Colon cancer)                               | 543/586                                                                    | 99   |
| 35a-l        | Various glycosidases                | -                                                   | 498/540                                                                    | 100  |
| 36a-e        | Various glycosidases                | -                                                   | 680/710                                                                    | 108  |

**Table S2.** Summary of activity-based probes (Abbreviation: CA = Cyclitol aziridine; CE = Cyclitol epoxide; o-QM = ortho-Quinone methide; p-QM = para-Quinone methide; DF = 2-deoxy-2-fluoroglycoside).

| No | Type                     | Target glycosidase                                       | Reporter tag                             | Sample<br>(Cells, lysates, secretome, etc.)                                                                                                 | Ref. |
|----|--------------------------|----------------------------------------------------------|------------------------------------------|---------------------------------------------------------------------------------------------------------------------------------------------|------|
| 37 | CA                       | $\alpha$ -Mannosidase                                    | Cy5 (37a)<br>Biotin (37b)<br>TAMRA (37c) | HEK293T (Kidney)                                                                                                                            | 132  |
| 38 | CA                       | $\beta$ -Mannosidase                                     | Cy5 (38a)<br>Biotin (38b)                | <i>C. mixtus</i><br><i>B. thetaiotaomicron</i><br>HEK293T (Kidney)                                                                          | 133  |
| 39 | Others                   | Endo-1,2- $\alpha$ -mannanase                            | Cy5                                      | -                                                                                                                                           | 134  |
| 40 | CA                       | $\alpha$ -galactosidase                                  | Cy5 (40a)<br>Biotin (40b)                | <i>N. benthamiana</i>                                                                                                                       | 137  |
| 41 | CA                       | $\alpha$ -arabinofuranosidase                            | Cy5 (41a)<br>Biotin (41b)                | <i>A. niger</i><br>Basidiomycetes                                                                                                           | 141  |
| 42 | CA                       | $\alpha$ -iduronidase                                    | Cy5 (42a)<br>Biotin (42b)                | Normal human dermal fibroblasts<br>Fibroblasts from MPS I patients                                                                          | 144  |
| 43 | CA                       | $\beta$ -xylosidase (43a-b)<br>$\beta$ -xylanase (43c-d) | Cy5 (43a, 43c)<br>Biotin (43b, 43d)      | Secretome from <i>A. niger</i>                                                                                                              | 146  |
| 44 | CE (44a-b)<br>CA (44c-d) | $\alpha$ -amylase                                        | Cy5 (44a, 44c-d)<br>Biotin (44b)         | Human saliva<br>Mouse pancreas tissue lysates<br>Mouse salivary gland lysates<br><i>A. nidulans</i>                                         | 148  |
| 45 | CE                       | $\beta$ -glucocerebrosidase                              | BODIPY green (45a)<br>BODIPY red (45b)   | Normal human dermal fibroblasts                                                                                                             | 151  |
| 46 | CE                       | $\beta$ -1,4-glucanase                                   | Cy5 (46a)<br>Biotin (46b)                | Secretomes from <i>A. niger</i><br>Complex fungal secretome                                                                                 | 154  |
| 47 | o-QM                     | $\alpha$ -fucosidase                                     | Azide                                    | <i>B. fragilis</i>                                                                                                                          | 155  |
| 48 | DF                       | $\alpha$ -fucosidase                                     | Azide                                    | -                                                                                                                                           | 156  |
| 49 | p-QM                     | Sialidase                                                | ROX                                      | A549 (Lung cancer)<br>HeLa (Cervical cancer)<br>HepG2 (Liver cancer)<br>MCF-7 (Breast cancer)<br>U2OS (Bone cancer)<br>Huh-7 (Liver cancer) | 161  |
| 50 | o-QM                     | O-GlcNAcase                                              | Coumarin                                 | HT-29 (Colon cancer)                                                                                                                        | 163  |

**Table S3.** Summary of glycosidase inhibitors.

| <b>No</b> | <b>Target glycosidase</b>   | <b>Biological Function</b>   | <b>Activity</b>                                                                              | <b>Ref.</b> |
|-----------|-----------------------------|------------------------------|----------------------------------------------------------------------------------------------|-------------|
| 51        | $\alpha$ -Mannosidase       | Anti-cancer                  | IC <sub>50</sub> = 3.0 $\mu$ M                                                               | 177         |
| 52        | $\alpha$ -Mannosidase       | Anti-cancer                  | IC <sub>50</sub> = 0.03 $\mu$ M (hGMII)<br>IC <sub>50</sub> = 3.2 $\mu$ M (hLMan)            | 178         |
| 53        | $\alpha$ -Mannosidase       | Anti-cancer                  | IC <sub>50</sub> = 42 $\mu$ M                                                                | 179         |
| 54        | $\alpha$ -Mannosidase       | -                            | IC <sub>50</sub> = 8 $\mu$ M (hGMII)<br>IC <sub>50</sub> = 18 $\mu$ M (hLMan)                | 180         |
| 55        | $\alpha$ -Mannosidase       | -                            | IC <sub>50</sub> = 0.45 $\mu$ M (hGMII)<br>IC <sub>50</sub> = 12 $\mu$ M (hLMan)             | 181         |
| 56        | $\alpha$ -Mannosidase       | -                            | K <sub>i</sub> = 0.23 $\mu$ M (JBMan)<br>K <sub>i</sub> = 5 $\mu$ M ( $\alpha$ -glucosidase) | 182         |
| 57        | $\alpha$ -Mannosidase       | -                            | K <sub>d</sub> = 11.5 $\mu$ M                                                                | 184         |
| 58        | $\beta$ -Galactosidase      | Pharmacological chaperone    | IC <sub>50</sub> = 10 nM<br>EC <sub>50</sub> = 500 nM                                        | 189         |
| 59        | $\beta$ -Galactosidase      | Pharmacological chaperone    | IC <sub>50</sub> = 94 nM                                                                     | 190         |
| 60        | $\beta$ -Galactosidase      | Pharmacological chaperone    | IC <sub>50</sub> = 1.5 mM<br>K <sub>i</sub> = 1.4 mM                                         | 191         |
| 61        | $\alpha$ -Galactosidase     | Pharmacological chaperone    | K <sub>i</sub> = 7.1 $\mu$ M                                                                 | 194         |
| 62        | $\alpha$ -Galactosidase     | Pharmacological chaperone    | K <sub>i</sub> = 4.2 $\mu$ M                                                                 | 195         |
| 63        | $\beta$ -Hexosaminidase     | Pharmacological chaperone    | K <sub>i</sub> = 580 nM                                                                      | 200         |
| 64        | $\beta$ -Hexosaminidase     | Insecticide                  | K <sub>i</sub> = 3.7 $\mu$ M                                                                 | 202         |
| 65        | $\beta$ -Hexosaminidase     | Larvicide                    | IC <sub>50</sub> = 47.5 $\mu$ M                                                              | 203         |
| 66        | O-GlcNAcase                 | -                            | K <sub>i</sub> = 0.6 $\mu$ M                                                                 | 207         |
| 67        | O-GlcNAcase                 | Drug for Alzheimer's disease | K <sub>i</sub> = 8.7 nM                                                                      | 212         |
| 68        | O-GlcNAcase                 | Drug for Alzheimer's disease | IC <sub>50</sub> = 53 nM                                                                     | 213         |
| 69        | O-GlcNAcase                 | -                            | K <sub>i</sub> = 220 pM                                                                      | 214         |
| 70        | O-GlcNAcase                 | Drug for tauopathies         | IC <sub>50</sub> = 46 nM                                                                     | 215         |
| 71        | $\beta$ -Glucocerebrosidase | Pharmacological chaperone    | K <sub>i</sub> = 13 nM (pH 7.0)<br>K <sub>i</sub> = 59 nM (pH 5.0)                           | 217         |
| 72        | $\beta$ -Glucocerebrosidase | Pharmaceutical chaperone     | K <sub>i</sub> = 101 $\mu$ M                                                                 | 221         |
| 73        | $\beta$ -Glucocerebrosidase | Pharmacological chaperone    | K <sub>i</sub> = 57.5 nM (pH 7.0)<br>K <sub>i</sub> = 476.9 nM (pH 5.5)                      | 222         |
| 74        | $\alpha$ -L-Fucosidase      | Anti-cancer                  | IC <sub>50</sub> = 2.5 $\mu$ M                                                               | 224         |
| 75        | $\alpha$ -L-Fucosidase      | -                            | K <sub>i</sub> = 4.8 $\mu$ M                                                                 | 225         |
| 76        | $\alpha$ -L-Fucosidase      | -                            | K <sub>i</sub> = 0.15 nM                                                                     | 227         |
| 77        | $\alpha$ -Glucosidase       | -                            | IC <sub>50</sub> = 0.11 $\mu$ M                                                              | 239         |
| 78        | $\alpha$ -Glucosidase       | Anti-diabetes                | IC <sub>50</sub> = 28 $\mu$ M                                                                | 240         |
| 79a       | $\alpha$ -Amylase           | -                            | K <sub>i</sub> = 70 nM                                                                       | 244         |
| 79b       | $\alpha$ -Amylase           | -                            | K <sub>i</sub> = 60 nM                                                                       | 244         |
| 80        | Chitinase                   | -                            | IC <sub>50</sub> = 29 nM                                                                     | 251         |



**Table S4.** Summary of glycosidase-activatable prodrugs.

| <b>No</b>               | <b>Target glycosidase</b>                                                                                              | <b>Drug</b>                | <b>Tumor cells</b>                                     | <b>Animal model<br/>Xenograft</b> | <b>IC<sub>50</sub></b> | <b>Ref.</b> |
|-------------------------|------------------------------------------------------------------------------------------------------------------------|----------------------------|--------------------------------------------------------|-----------------------------------|------------------------|-------------|
| <b>81</b><br><b>81'</b> | $\beta$ -Glucuronidase                                                                                                 | MMAE                       | LS174T (Colon)                                         | LS174T (Colon)                    | -                      | 261         |
| <b>82</b>               | $\beta$ -Glucuronidase                                                                                                 | MMAE                       | MDA-MB-231 (Breast)                                    | MDA-MB-231 (Breast)               | 3.3 nM                 | 262         |
| <b>83</b>               | $\beta$ -Glucuronidase                                                                                                 | Curcumin                   | HCT116 (Colon)                                         | HCT116 (Colon)                    | -                      | 263         |
| <b>84</b>               | $\beta$ -Glucuronidase                                                                                                 | Synthetic anticancer agent | MDA-MB-231 (Breast)<br>MCF-7 (Breast)<br>HeLa (Cervix) | MDA-MB-231 (Breast)               | 9-16 nM                | 264         |
| <b>85</b>               | $\beta$ -Galactosidase                                                                                                 | Gemcitabine                | HepG2 (Liver)                                          | -                                 | 1.6 $\mu$ M            | 265         |
| <b>86</b>               | $\beta$ -Galactosidase                                                                                                 | Linifanib                  | A549 (Lung)<br>H1299 (Lung)                            | A549 (Lung)                       | -                      | 268         |
| <b>87</b>               | $\beta$ -Glucosidase                                                                                                   | Losartan                   | -                                                      | Dog                               | -                      | 269         |
| <b>88a-b</b>            | $\beta$ -Galactosidase ( <b>88a</b> )<br>$\beta$ -Glucuronidase ( <b>88b</b> )                                         | Amonafide                  | HeLa (Cervix)<br>HCT116 (Breast)<br>HepG2 (Liver)      | -                                 | -                      | 273         |
| <b>89a</b>              | $\beta$ -Galactosidase ( <b>89a</b> )<br>$\alpha$ -Mannosidase ( <b>89b</b> )<br>$\beta$ -Glucuronidase ( <b>89c</b> ) | Resiquimod                 | B16 (Skin)<br>TC2 (Prostate)<br>4T1 (Breast)           | -                                 | -                      | 274         |
